# Supplementary material for: Untargeted Metabolomics Approach Correlated Enniatin B Mycotoxin Presence in Cereals with Kashin–Beck Disease Endemic Regions of China
Source: MDPI journal article supplement (doi:10.3390/toxins15090533), 2023-08-30
Supplement: s1 [file s1]

# Supplementary Materials: Untargeted Metabolomics Approach Correlated Enniatin B Mycotoxin Presence in Cereals with Kashin–Beck Disease Endemic Regions of China

Danlei Sun, Camille Chasseur, Françoise Mathieu, Jessica Lechanteur, Pierre Van Antwerpen, Joanne Rasschaert, Véronique Fontaine, Cédric Delporte

Table S1. Detection of Enniatin B in barley samples.

| Sample characteristic        | Sample name | Concentration (µg/kg) |
|------------------------------|-------------|-----------------------|
| Pooled samples               | TAR1_2013   | nd                    |
|                              | TAR1_2016   | nd                    |
|                              | TAR2_2013   | 272.63                |
|                              | TAR2_2016   | 211.02                |
|                              | TAR3_2009   | 79.55                 |
|                              | TAR3_2011   | 43.65                 |
|                              | TAR3_2012   | 50.45                 |
| Individual TAR1-2013 samples | T6          | nd                    |
|                              | T7          | nd                    |
|                              | T8          | nd                    |
|                              | T9          | nd                    |
|                              | T10         | nd                    |
| TAR1-2016                    | R9_2016     | nd                    |
|                              | R17_2016    | nd                    |
|                              | R28_2016    | nd                    |
|                              | R31_2016    | nd                    |
|                              | R40_2016    | nd                    |
|                              | R44_2016    | nd                    |
| TAR2-2013                    | R1          | 116.34                |
|                              | R2          | 124.17                |
|                              | R6          | 207.22                |
|                              | R9          | 312.61                |
|                              | R12         | 206.08                |
|                              | R14         | 436.77                |
|                              | R16         | 162.68                |
|                              | R17         | 65.85                 |
|                              | R31         | 79.08                 |
|                              | R32         | 120.17                |
|                              | R33         | 61.12                 |
| TAR2-2016                    | C3          | 46.56                 |
|                              | C5          | 118.06                |
|                              | C6          | 1493.64               |
|                              | C7          | 16.62                 |
|                              | C10         | 340.71                |
|                              | C11         | 53.50                 |
|                              | C20         | 286.90                |
|                              | C21         | 564.24                |
|                              | C23         | 120.06                |
|                              | C24         | 71.64                 |

|           |           |        |
|-----------|-----------|--------|
|           | C28       | 76.50  |
|           | C35       | 180.68 |
|           | C36       | 67.47  |
|           | C44       | 402.41 |
|           | C45       | 78.73  |
|           | C48       | 78.68  |
|           | C65       | 247.81 |
| TAR3-2009 | QC3_2009  | 283.96 |
|           | QC4_2009  | 73.85  |
|           | QC5_2009  | 19.94  |
|           | QC9_2009  | 80.77  |
|           | QC10_2009 | 344.75 |
|           | QC16_2009 | 18.34  |
|           | QC17_2009 | 74.84  |
|           | QC19_2009 | 24.63  |
|           | QC21_2009 | 70.48  |
| TAR3-2011 | QC20_2011 | 163.18 |
|           | QC29_2011 | 65.94  |
|           | QC32_2011 | 81.81  |
|           | QC34_2011 | 41.10  |
|           | QC37_2011 | 40.92  |
| TAR3-2012 | QC3_2012  | 22.45  |
|           | QC12_2012 | 41.91  |
|           | QC14_2012 | 18.30  |
|           | QC18_2012 | 56.08  |
|           | QC25_2012 | 70.94  |
|           | QC36_2012 | 30.00  |

nd (not detected), nd < LOD.

**Table S2.** List of barley samples with their origin (both of EA and NEA) and harvested year.

| Sample group                     | Sample names <sup>a</sup> | Origin    | Harvested year |
|----------------------------------|---------------------------|-----------|----------------|
| Non-Enniatin B detected samples  | N1; R9_2016               | TAR-1-NEA | 2016           |
|                                  | N2; R17_2016              | TAR-1-NEA | 2016           |
|                                  | N3; R40_2016              | TAR-1-NEA | 2016           |
|                                  | N4; QC16_2012             | TAR-3-EA  | 2012           |
|                                  | N5; QC30_2012             | TAR-3-EA  | 2012           |
| High Enniatin B detected samples | H1; C6                    | TAR-2-EA  | 2016           |
|                                  | H2; C7                    | TAR-2-EA  | 2016           |
|                                  | H3; C21                   | TAR-2-EA  | 2016           |
|                                  | H4; C20                   | TAR-2-EA  | 2016           |
|                                  | H5; C36                   | TAR-2-EA  | 2016           |
|                                  | H6; C48                   | TAR-2-EA  | 2016           |
|                                  | H7; QC10_2009             | TAR-3-EA  | 2009           |
|                                  | H8; R6                    | TAR-2-EA  | 2013           |
|                                  | H9; R31                   | TAR-2-EA  | 2013           |
|                                  | H10; R16                  | TAR-2-EA  | 2013           |

<sup>a</sup> Sample names mention first a short-called name for *Fusarium* DNA quantification experiment followed by the sample name used in Enniatin B quantification (Table S1).
