# Supplementary material for: Untargeted Metabolomics Approach Correlated Enniatin B Mycotoxin Presence in Cereals with Kashin–Beck Disease Endemic Regions of China
Source: MDPI journal article supplement (doi:10.3390/toxins15090533), 2023-08-30
Supplement: s1 [file s1]

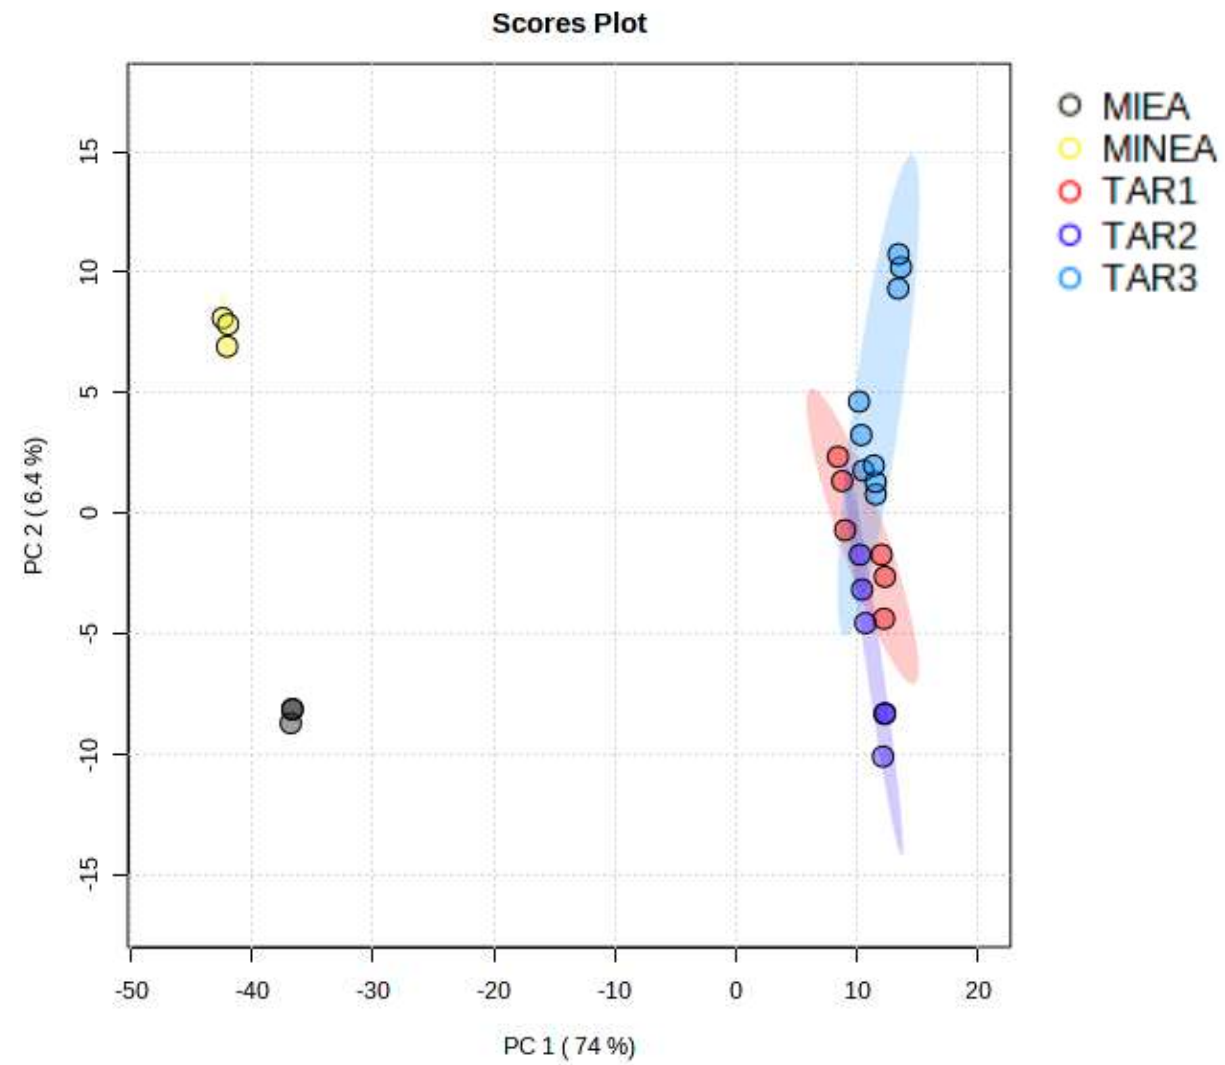

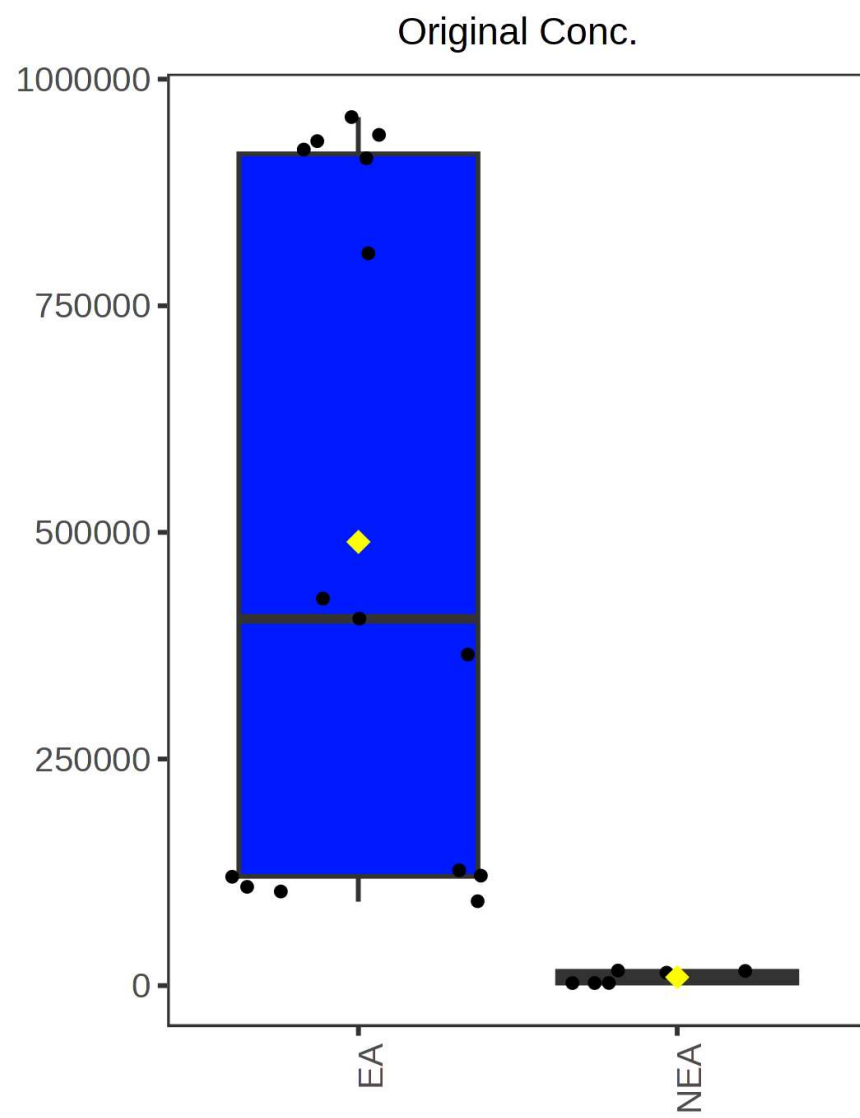

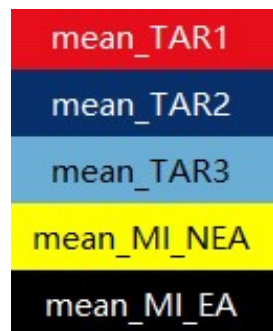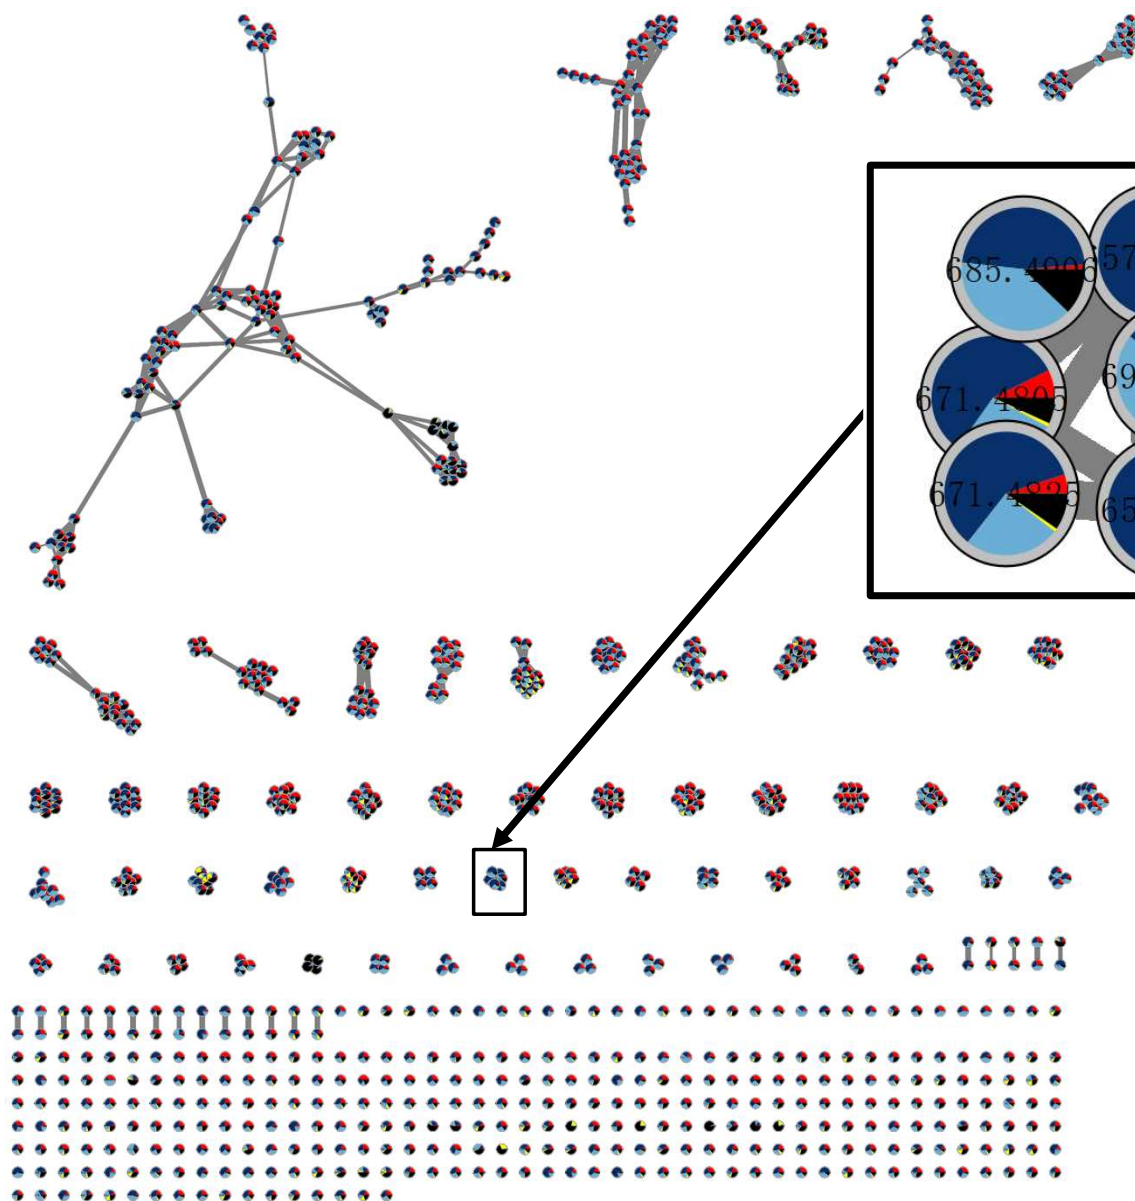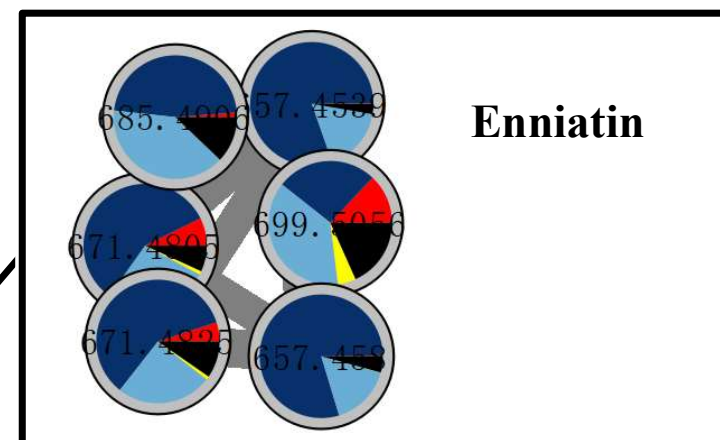

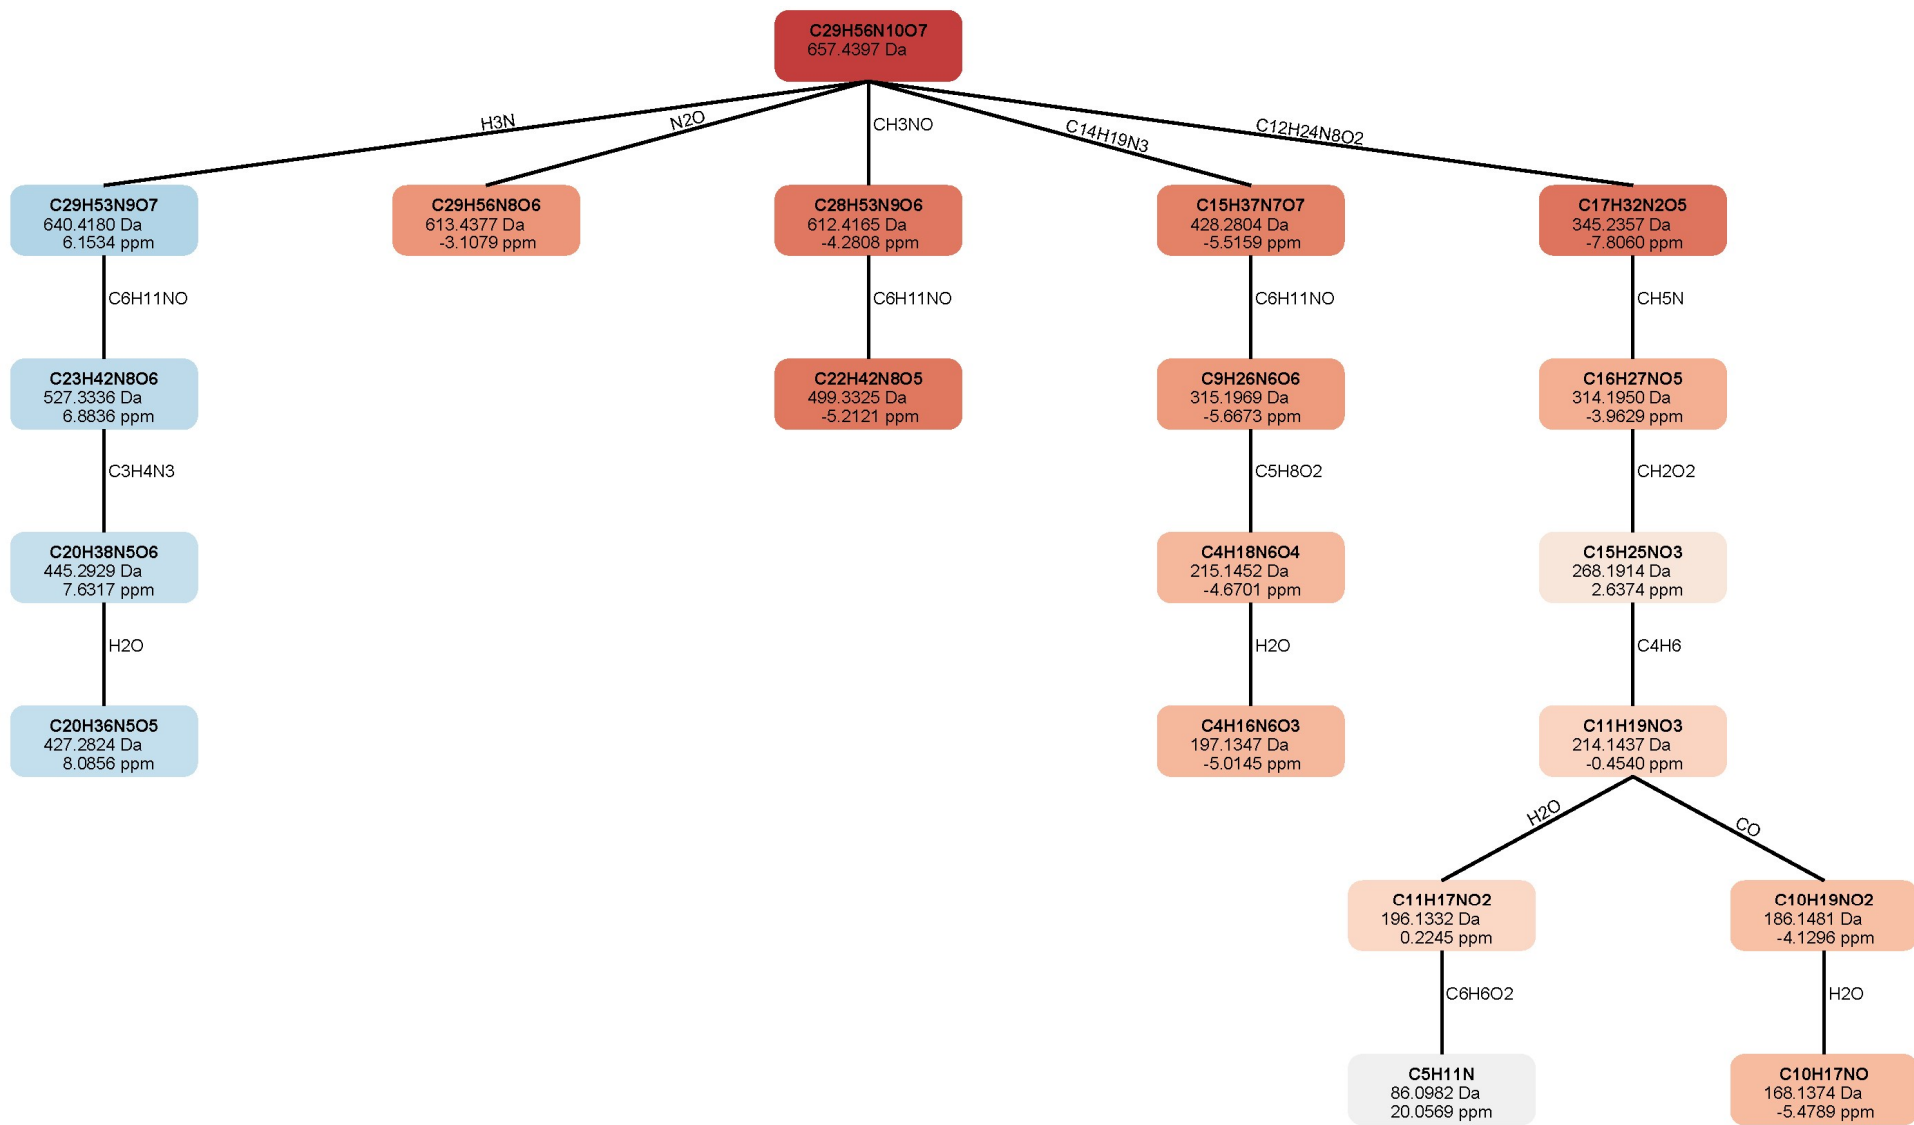

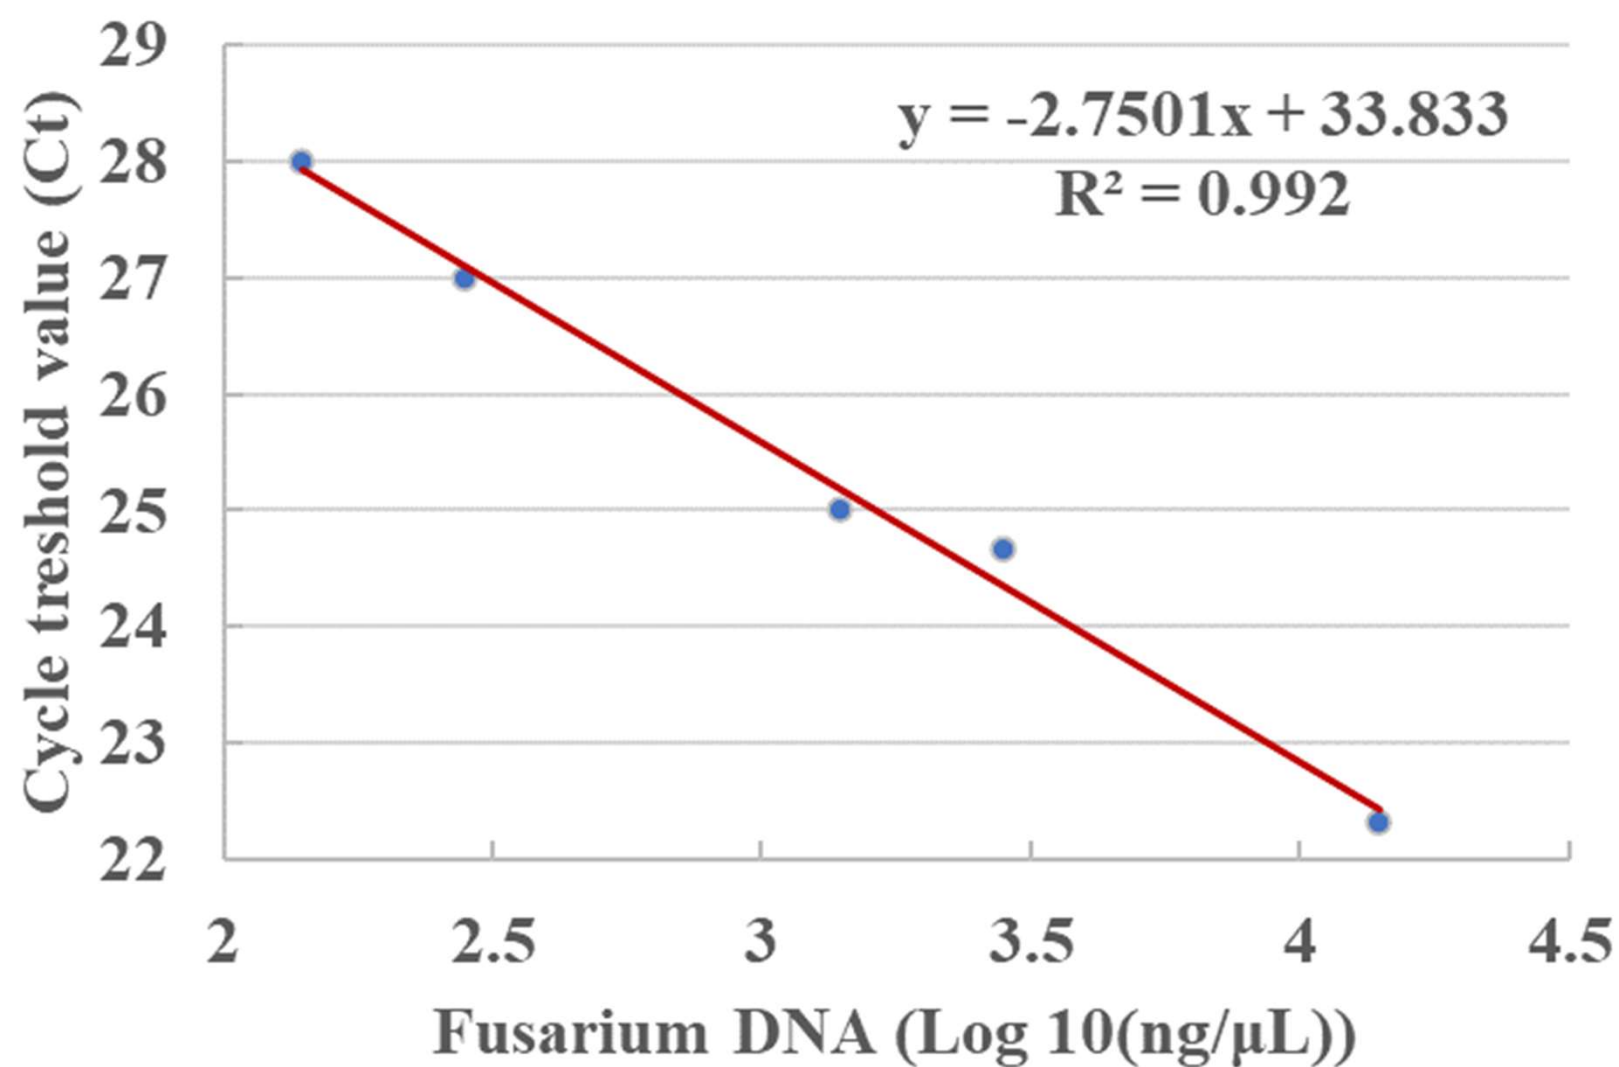

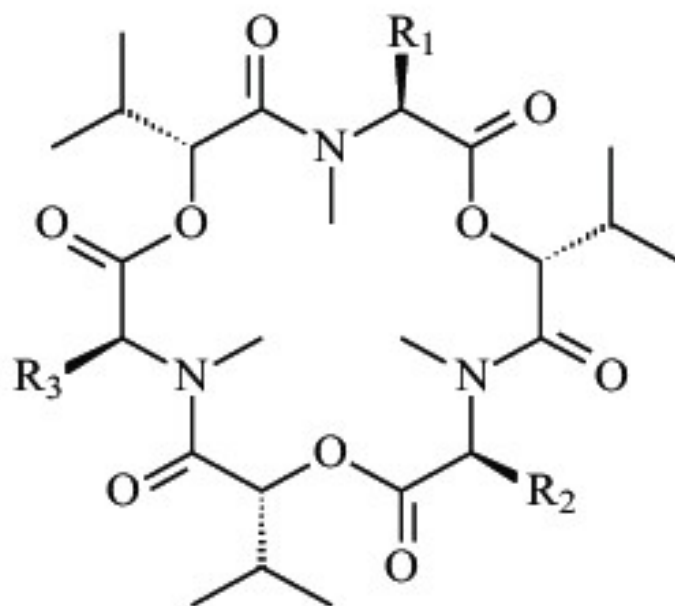

| ENN         | R1                                                  | R2                                                  | R3                                                  | Elemental<br>Formula                                          | Molecular<br>weight (g/mol) | Exact mass (m/z)   |                                   |                     | Reference                |
|-------------|-----------------------------------------------------|-----------------------------------------------------|-----------------------------------------------------|---------------------------------------------------------------|-----------------------------|--------------------|-----------------------------------|---------------------|--------------------------|
|             |                                                     |                                                     |                                                     |                                                               |                             | [M+H] <sup>+</sup> | [M+NH <sub>4</sub> ] <sup>+</sup> | [M+Na] <sup>+</sup> |                          |
| Enniatin A  | CH(CH <sub>3</sub> )CH <sub>2</sub> CH <sub>3</sub> | CH(CH <sub>3</sub> )CH <sub>2</sub> CH <sub>3</sub> | CH(CH <sub>3</sub> )CH <sub>2</sub> CH <sub>3</sub> | C <sub>36</sub> H <sub>63</sub> N <sub>3</sub> O <sub>9</sub> | 681                         | 682.4637           | 699.4903                          | 704.4456            | (Malachova et al., 2011) |
| Enniatin A1 | CH(CH <sub>3</sub> )CH <sub>2</sub> CH <sub>3</sub> | CH(CH <sub>3</sub> )CH <sub>2</sub> CH <sub>3</sub> | CH(CH <sub>3</sub> )CH <sub>2</sub> CH <sub>3</sub> | C <sub>35</sub> H <sub>61</sub> N <sub>3</sub> O <sub>9</sub> | 667                         | 668.4481           | 685.4746                          | 690.4300            |                          |
| Enniatin B  | CH(CH <sub>3</sub> ) <sub>2</sub>                   | CH(CH <sub>3</sub> ) <sub>2</sub>                   | CH(CH <sub>3</sub> ) <sub>2</sub>                   | C <sub>33</sub> H <sub>57</sub> N <sub>3</sub> O <sub>9</sub> | 639                         | 640.4168           | 657.4433                          | 662.3987            |                          |
| Enniatin B1 | CH(CH <sub>3</sub> ) <sub>2</sub>                   | CH(CH <sub>3</sub> ) <sub>2</sub>                   | CH(CH <sub>3</sub> )CH <sub>2</sub> CH <sub>3</sub> | C <sub>34</sub> H <sub>59</sub> N <sub>3</sub> O <sub>9</sub> | 653                         | 654.4324           | 671.4589                          | 676.4143            |                          |
